# Supplementary material for: A Novel Na(I) Coordination Complex with s-Triazine Pincer Ligand: Synthesis, X-ray Structure, Hirshfeld Analysis, and Antimicrobial Activity
Source: MDPI journal article supplement (doi:10.3390/cryst13060890), 2023-05-29
Supplement: s1 [file s1]

Archive with 1 entries (1 files):
- crystals-2409274-supplementary.pdf
